# Supplementary material for: A versatile genetic tool for post-translational control of gene expression in Drosophila melanogaster
Source: eLife. 2017 Nov 15;6:e30327. doi: 10.7554/eLife.30327 (PMC5703639; doi:10.7554/eLife.30327)
Supplement: Figure 1—figure supplement 2—source data 1. [file elife-30327-fig1-figsupp2-data1.xlsx]

## Sheet: Sheet1
LARVA
	S.No.	ROI1	Back1	Back2	Back3	Avg	Norm. Avg			S.No.	ROI1	Back1	Back2	Back3	Avg	Norm. Avg
Solvent	1	0.81	0	0	0	0.81	0.627421		TMP	1	53.902	0	0.464	0	53.7473	41.6323
	2	1.619	0	0	0	1.619	1.25407			2	55.5	0	0	0	55.5	42.9899
	3	1.604	0	0	0	1.604	1.24245			3	52.777	0	0	0	52.777	40.8807
	4	1.162	0	0	0	1.162	0.900077			4	48.816	0	0	0.268	48.7267	37.7434
	5	1.33	0	0	0	1.33	1.03021			5	65.111	0.003	0	0.003	65.109	50.433
	6	1.226	0	0	0	1.226	0.949651			6	67.329	0	0.114	0	67.291	52.1232
					Average	1.29183	1.00065							Average	57.1918	44.3004
					SEM	0.123733	0.0958429							SEM	3.00306	2.32615
48 HR PUPA
	S.No.	ROI1	Back1	Back2	Back3	Avg	Norm. Avg			S.No.	ROI1	Back1	Back2	Back3	Avg	Norm. Avg
Solvent	1	1.105	0.083	0	0	1.07733	0.268662		TMP	1	77.55	0	0	0	77.55	19.3392
	2	3.227	0	0	0	3.227	0.804738			2	52.403	0	0.002	0.0005388	52.4022	13.0679
	3	6.643	0.000189	0	0	6.64294	1.65659			3	84.632	0	0	0	84.632	21.1052
	4	6.762	0.000947	0	0.001	6.76135	1.68612			4	91.789	0	0.001	0.0001894	91.7886	22.8899
	5	2.346	0	0	0.001	2.34567	0.584954			5	62.215	0	0	0.0009642	62.2147	15.5149
	6									6	90.805	0	0	0.001	90.8047	22.6446
					Average	4.01086	1.00021							Average	76.5654	19.0936
					SEM	1.15078	0.286978							SEM	6.55832	1.63549
96 HR PUPA
	S.No.	ROI1	Back1	Back2	Back3	Avg	Norm. Avg			S.No.	ROI1	Back1	Back2	Back3	Avg	Norm. Avg
Solvent	1	6.408	0	0	0.002	6.40733	0.65987		TMP	1	48.133	0	0.000641	0.0008528	48.1325	4.957
	2	10.985	0	0	0	10.985	1.13131			2	25.96	0.001	0.0003861	0.0008361	25.9593	2.67346
	3	10.976	0	0	0	10.976	1.13038			3	35.931	0	0	0	35.931	3.70041
	4	8.685	0.0001647	0	0	8.68495	0.894433			4	43.518	0	0.0005383	0.0002612	43.5177	4.48174
	5	10.985	0	0	0.001	10.9847	1.13127			5	91.851	0.0008754	0	0.002	91.85	9.45932
	6	10.283	0.000496	0.001	0.002	10.2818	1.05889			6
					Average	9.71996	1.00103							Average	49.0781	5.05439
					SEM	0.75582	0.0778393							SEM	11.3326	1.16711
<12 HR ADULT
	S.No.	ROI1	Back1	Back2	Back3	Avg	Norm. Avg			S.No.	ROI1	Back1	Back2	Back3	Avg	Norm. Avg
Solvent	1	4.814	0	0	0	4.814	1.20652		TMP	1	38.531	0	0	0	38.531	9.65689
	2	4.295	0	0	0	4.295	1.07644			2	18.984	0	0.0001429	0.001	18.9836	4.7578
	3	3.193	0	0	0	3.193	0.800251			3	12.437	0.0008224	0	0	12.4367	3.11697
	4	4.017	0	0	0	4.017	1.00677			4	6.858	0.013	0	0	6.85367	1.71771
	5	3.528	0.019	0	0	3.52167	0.882623			5	28.631	0	0	0	28.631	7.17569
	6	4.1	0	0	0	4.1	1.02757			6	12.962	0.008	0	0	12.9593	3.24795
					Average	3.99011	1.00003							Average	19.7326	4.9455
					SEM	0.233764	0.0585876							SEM	4.82389	1.20899
3 DAYS ADULT
	S.No.	ROI1	Back1	Back2	Back3	Avg	Norm. Avg			S.No.	ROI1	Back1	Back2	Back3	Avg	Norm. Avg
Solvent	1	0.48	0.003	0	0	0.479	0.2395		TMP	1	42.043	0	0	0	42.043	21.0215
	2	1.14	0	0	0	1.14	0.57			2	33.619	0	0.047	0	33.6033	16.8017
	3	1.274	0	0	0	1.274	0.637			3	46.908	0	0.0001068	0.000434	46.9078	23.4539
	4	1.722	0	0	0	1.722	0.861			4	69.11	0	0	0	69.11	34.555
	5	2.936	0.0001623	0	0	2.93595	1.46797			5	63.682	0	0	0	63.682	31.841
	6	4.456	0	0	0	4.456	2.228			6	78.106	0	0	0	78.106	39.053
					Average	2.00116	1.00058							Average	55.5754	27.7877
					SEM	0.593445	0.296723							SEM	7.0653	3.53265
