# Supplementary material for: A versatile genetic tool for post-translational control of gene expression in Drosophila melanogaster
Source: eLife. 2017 Nov 15;6:e30327. doi: 10.7554/eLife.30327 (PMC5703639; doi:10.7554/eLife.30327)
Supplement: Figure 1—figure supplement 3—source data 1. — TMP-dependent GFP expression in different tissues. [file elife-30327-fig1-figsupp3-data1.xlsx]

## Sheet: Sheet1
FIGURE 1 - SUPPLEMENT 3-A
	Cell Type :	Projection neurons (GH146) - dendrites
	S.No.	ROI1	ROI2	Back1	Back2	Back3	Avg	Norm. Avg			S.No.	ROI1	ROI2	Back1	Back2	Back3	Avg	Norm. Avg
Solvent	1	8.171	7.363	5.355	5.559	5.046	2.447	0.899632		TMP	1	37.348	33.143	7.916	7.682	6.43	27.9028	10.2584
	2	8.103	8.314	5.828	6.344	5.168	2.4285	0.892831			2	18.595	21.167	6.521	6.783	4.996	13.781	5.06654
	3	8.433	8.183	5.47	5.682	5.15	2.874	1.05662			3	16.852	20.284	7.062	7.034	5.972	11.8787	4.36716
	4	8.657	9.157	6.378	6.071	6.609	2.55433	0.939093			4	24.756	23.593	8.131	8.256	5.746	16.7968	6.17531
	5	9.56	9.616	6.726	6.724	5.875	3.14633	1.15674			5	20.342	25.844	7.393	7.948	6.558	15.7933	5.80637
	6	9.473	8.947	7.016	6.219	5.769	2.87533	1.05711			6	21.388	20.246	7.67	7.417	5.808	13.852	5.09265
						Average	2.72092	1.00034								Average	16.6674	6.12774
						SEM	0.117834	0.0433214								SEM	2.35376	0.865353
	Cell Type :	Gr5a - dendrites (right only)
	S.No.	ROI1	Back1	Back2	Back3	Avg	Norm. Avg			S.No.	ROI1	Back1	Back2	Back3	Avg	Norm. Avg
Solvent	1	1.561	0.429	0.396	0.396	1.154	0.874905		TMP	1	97.715	0.095	0.084	0.403	97.521	73.9356
	2	2.257	0.64	0.597	0.345	1.72967	1.31135			2	79.792	0.096	0.097	0.673	79.5033	60.2755
	3	1.588	0.328	0.41	0.301	1.24167	0.94137			3	74.44	0.506	0.63	0.499	73.895	56.0235
	4	1.799	0.354	0.446	0.349	1.416	1.07354			4	103.745	0.53	0.489	0.452	103.255	78.2825
	5	1.15	0.387	0.359	0.295	0.803	0.608795			5	74.956	0.155	0.162	0.457	74.698	56.6323
	6	1.996	0.371	0.415	0.487	1.57167	1.19156			6	78.092	0.49	0.472	0.483	77.6103	58.8403
					Average	1.31933	1.00025							Average	84.4137	63.9983
					SEM	0.134333	0.101844							SEM	5.17113	3.9205
	Cell Type :	Kenyon cells - horizontal lobe - gamma (right only)
	S.No.	ROI1	Back1	Back2	Back3	Avg	Norm. Avg			S.No.	ROI1	Back1	Back2	Back3	Avg	Norm. Avg
Solvent	1	30.918	2.293	2.66	3.026	28.2583	0.774838		TMP	1	120.197	4.231	4.151	3.444	116.255	3.18769
	2	47.621	3.237	3.195	3.982	44.1497	1.21057			2	98.534	2.814	3.691	4.605	94.8307	2.60024
	3	39.392	3.108	2.451	2.036	36.8603	1.0107			3	204.278	5.8	6.688	4.86	198.495	5.4427
	4	32.71	3.273	3.538	4.084	29.0783	0.797322			4	169.919	5.971	4.613	4.563	164.87	4.5207
	5	42.79	3.879	4.392	3.253	38.9487	1.06796			5	103.231	4.704	4.602	4.162	98.7417	2.70748
	6	45.014	3.232	3.562	3.567	41.5603	1.13958			6	171.274	4.576	5.483	4.472	166.43	4.56349
					Average	36.4759	1.00016							Average	139.937	3.83705
					SEM	2.66616	0.0731057							SEM	17.3639	0.476113
	Cell Type :	OSNs (Orco)
	S.No.	ROI1	Back1	Back2	Back3	Avg	Norm. Avg			S.No.	ROI1	Back1	Back2	Back3	Avg	Norm. Avg
Solvent	1	6.805	2.478	2.962	3.371	3.868	1.45414		TMP	1	86.804	1.784	1.901	1.645	85.0273	31.9652
	2	4.906	1.722	2.086	2.529	2.79367	1.05025			2	106.892	3.041	3.069	2.977	103.863	39.0462
	3	4.984	2.591	2.497	2.684	2.39333	0.899749			3	144.967	3.295	4.388	3.462	141.252	53.1023
	4	4.405	2.486	2.176	2.126	2.14233	0.805388			4	157.667	4.637	4.231	4.181	153.317	57.6381
	5	4.655	2.155	2.059	1.835	2.63867	0.99198			5	136.412	3.354	3.537	4.32	132.675	49.8778
	6	4.28	2.139	2.016	2.202	2.161	0.812406			6	117.323	2.971	3.878	3.195	113.975	42.8477
					Average	2.66617	1.00232							Average	121.685	45.7462
					SEM	0.26239	0.0986427							SEM	10.3684	3.89789
	Cell Type :	P1 (right triangle region)
	S.No.	ROI1	Back1	Back2	Back3	Avg	Norm. Avg			S.No.	ROI1	Back1	Back2	Back3	Avg	Norm. Avg
Solvent	1	28.31	26.58	29.472	22.869	2.003	0.6279		TMP	1	49.736	24.684	23.484	24.934	25.3687	7.95256
	2	28.058	25.155	21.414	25.789	3.93867	1.23469			2	37.123	21.701	21.042	22.371	15.4183	4.83333
	3	27.434	24.371	24.667	25.449	2.605	0.816614			3	63.357	27.999	26.955	26.612	36.1683	11.338
	4	27.655	21.539	26.619	25.163	3.21467	1.00773			4	47.079	24.821	25.285	25.864	21.7557	6.81996
	5	28.913	23.134	26.751	27.002	3.284	1.02947			5	46.214	25.93	26.195	27.306	19.737	6.18715
	6	30.224	23.002	27.183	28.157	4.11	1.2884			6	63.745	27.126	29.07	28.397	35.5473	11.1434
					Average	3.19256	1.0008							Average	25.6659	8.04573
					SEM	0.324936	0.101861							SEM	3.48084	1.09117
	Cell Type :	tdc2 (sog region)
	S.No.	ROI1	Back1	Back2	Back3	Avg	Norm. Avg			S.No.	ROI1	Back1	Back2	Back3	Avg	Norm. Avg
Solvent	1	12.241	1.51	1.37	1.47	10.791	1.56414		TMP	1	34.866	1.345	1.448	1.238	33.5223	4.85901
	2	8.144	1.131	1.011	0.974	7.10533	1.02991			2	52.789	2.312	0.831	2.108	51.0387	7.39798
	3	6.372	1.004	0.775	1.091	5.41533	0.784945			3	23.711	1.219	0.589	0.614	22.9037	3.31985
	4	8.147	1.121	1.022	1.36	6.97933	1.01164			4	34.726	1.331	1.033	0.513	33.767	4.89448
	5	7.824	1.636	1.725	1.543	6.18933	0.897135			5	53.893	1.65	2.471	0.986	52.1907	7.56496
	6	5.892	1.033	0.932	0.963	4.916	0.712567			6	26.114	2.151	2.282	1.903	24.002	3.47905
					Average	6.89939	1.00006							Average	36.2374	5.25256
					SEM	0.853109	0.123657							SEM	5.21073	0.755288
	Cell Type :	r58e02 (th - y lobe dendrites)
	S.No.	ROI1	Back1	Back2	Back3	Avg	Norm. Avg			S.No.	ROI1	Back1	Back2	Back3	Avg	Norm. Avg
Solvent	1	2.689	0.114	0.136	0.043	2.59133	0.81335		TMP	1	17.042	0.077	0.089	0.032	16.976	5.32831
	2	2.74	0.134	0.14	0.078	2.62267	0.823185			2	54.872	0.069	0.178	0.462	54.6357	17.1487
	3	3.503	0.113	0.112	0.074	3.40333	1.06822			3	49.955	0.145	0.236	0.062	49.8073	15.6332
	4	3.476	0.092	0.089	0.101	3.382	1.06152			4	40.508	0.201	0.171	0.198	40.318	12.6547
	5	4.017	0.066	0.177	0.097	3.90367	1.22526			5	20.268	0.106	0.103	0.148	20.149	6.32423
	6	3.305	0.094	0.062	0.113	3.21533	1.00921			6	42.16	0.153	0.203	0.038	42.0287	13.1917
					Average	3.18639	1.00012							Average	37.3191	11.7135
					SEM	0.205955	0.0646439							SEM	6.31307	1.9815
	Cell Type :	MBONs (cell bodies)
	S.No.	ROI1	Back1	Back2	Back3	Avg	Norm. Avg			S.No.	ROI1	Back1	Back2	Back3	Avg	Norm. Avg
Solvent	1	23.829	5.806	5.926	6.263	17.8307	1.29583		TMP	1	88.411	5.135	4.681	4.296	83.707	6.08336
	2	15.886	5.491	5.375	5.372	10.4733	0.761143			2	76.658	5.734	5.877	4.303	71.3533	5.18556
	3	18.408	5.538	5.777	4.924	12.995	0.944404			3	129.71	6.324	5.929	4.894	123.994	9.01122
	4									4	100.062	5.734	5.811	5.868	94.2577	6.85012
	5									5	88.165	5.851	6.294	6.569	81.927	5.954
	6									6
					Average	13.7663	1.00046							Average	91.0479	6.61685
					SEM	2.15861	0.156876							SEM	9.00202	0.654216
