# Supplementary material for: A versatile genetic tool for post-translational control of gene expression in Drosophila melanogaster
Source: eLife. 2017 Nov 15;6:e30327. doi: 10.7554/eLife.30327 (PMC5703639; doi:10.7554/eLife.30327)
Supplement: Figure 1—figure supplement 4—source data 1. — Effect of TMP on survival and behavior. [file elife-30327-fig1-figsupp4-data1.xlsx]

## Sheet: Sheet 1
FIGURE 1 - SUPPLEMENT 4-A
Solvent							0.1mM						1mM						10 mM
	No of dead flies (out of 15)							No of dead flies (out of 15)						No of dead flies (out of 15)						No of dead flies (out of 15)
Day no.	Set1	Set2	Set3	Set4			Day no.	Set1	Set2	Set3	Set4		Day no.	Set1	Set2	Set3	Set4		Day no.	Set1	Set2	Set3	Set4
0	0	0	0	0			0	0	0	0	0		0	0	0	0	0		0	0	0	0	0
1	0	0	0	0			1	0	0	0	0		1	0	0	0	0		1	0	0	0	0
2	0	0	0	0			2	0	0	0	0		2	0	0	0	0		2	0	0	0	0
3	0	0	0	0			3	0	0	0	0		3	0	0	0	0		3	0	0	0	0
4	0	0	0	0			4	0	0	0	0		4	0	0	0	0		4	0	0	0	0
5	0	0	0	0			5	0	1	0	0		5	0	0	0	0		5	0	0	0	0
6	0	0	0	0			6	0	0	0	0		6	0	0	0	0		6	0	0	0	0
7	1	0	0	0			7	0	0	0	0		7	0	0	0	0		7	0	1	0	0
8	0	0	0	0			8	0	0	0	0		8	1	0	0	0		8	0	0	0	0
9	0	0	0	0			9	0	0	0	0		9	0	0	0	0		9	1	0	0	0
10	0	0	0	0			10	0	0	0	0		10	0	0	0	0		10	0	0	0	0
11	0	0	0	0			11	0	0	0	0		11	0	0	0	0		11	0	0	0	0
12	0	0	0	0			12	0	0	0	0		12	0	0	0	0		12	0	0	0	0
13	0	0	0	0			13	0	1	0	1		13	0	1	0	0		13	0	1	1	0
14	1	0	0	0			14	0	0	0	0		14	0	0	0	0		14	0	0	0	0
15	0	0	0	0			15	0	0	0	0		15	1	0	0	0		15	0	0	0	0
16	0	1	0	0			16	1	0	0	1		16	1	0	0	0		16	0	0	0	0
17	0	0	1	0			17	1	0	0	1		17	0	0	0	0		17	0	0	0	0
18	0	1	0	1			18	1	0	0	0		18	1	1	0	1		18	0	0	0	0
19	0	0	0	0			19	0	0	0	0		19	0	1	0	0		19	0	0	0	0
20	0	0	0	0			20	0	0	0	0		20	0	0	0	0		20	0	1	0	0
21	0	1	0	0			21	0	0	1	0		21	1	1	0	0		21	0	1	0	0
22	1	0	0	0			22	1	0	0	0		22	0	1	0	0		22	0	1	0	0
23	1	0	0	0			23	0	0	1	0		23	1	0	0	0		23	0	1	0	0
24	1	0	1	1			24	0	0	0	0		24	0	0	1	1		24	2	0	1	1
25	0	0	0	0			25	2	0	2	0		25	0	0	1	0		25	1	0	0	0
26	0	0	0	2			26	0	0	0	0		26	0	0	0	0		26	0	0	0	1
27	0	1	0	2			27	0	1	2	0		27	0	2	1	0		27	0	0	1	2
28	2	0	0	0			28	0	0	0	1		28	1	1	1	2		28	1	1	1	0
29	0	2	0	0			29	0	1	0	0		29	0	0	0	0		29	1	2	1	0
30	1	0	0	1			30	0	0	0	0		30	0	3	0	0		30	2	1	0	2
31	0	2	0	2			31	1	1	3	0		31	0	1	1	0		31	0	0	0	0
32	2	1	1	1			32	2	3	2	1		32	1	0	1	1		32	0	1	0	1
33	0	0	1	1			33	1	1	0	1		33	0	0	0	2		33	1	0	0	0
34	0	0	1	0			34	0	1	1	2		34	2	0	0	1		34	1	0	2	0
35	2	1	2	0			35	1	0	0	1		35	1	1	0	2		35	0	0	0	2
36	0	1	0	1			36	2	0	0	2		36	1	1	3	1		36	1	1	2	1
37	0	1	1	1			37	2	0	0	0		37	1	1	0	0		37	2	1	1	0
38	0	1	1	0			38	0	1	1	0		38	0	0	0	0		38	0	1	0	1
39	1	0	0	0			39	0	0	0	0		39	2	0	1	1		39	1	0	0	0
40	0	0	0	0			40	0	1	0	1		40	0	0	0	0		40	0	0	2	2
41	0	0	1	1			41	0	0	0	1		41	0	0	1	0		41	0	0	1	1
42	0	0	1	1			42	0	0	0	0		42	0	0	1	0		42	0	0	0	0
FIGURE 1 - SUPPLEMENT 4-B
PUPAE													ADULT
Solvent						1mM							Solvent						1mM
	No. of pupae (cumulative)						No. of pupae (cumulative)							No. of adults (cumulative)						No. of adults (cumulative)
Day no.	Set1	Set2	Set3	Set4		Day no.	Set1	Set2	Set3	Set4			Day no.	Set1	Set2	Set3	Set4		Day no.	Set1	Set2	Set3	Set4
0	0	0	0	0		0	0	0	0	0			0	0	0	0	0		0	0	0	0	0
1	0	0	0	0		1	0	0	0	0			1	0	0	0	0		1	0	0	0	0
2	0	0	0	0		2	0	0	0	0			2	0	0	0	0		2	0	0	0	0
3	0	0	0	0		3	0	0	0	0			3	0	0	0	0		3	0	0	0	0
4	0	0	0	0		4	0	0	0	0			4	0	0	0	0		4	0	0	0	0
5	10	5	9	7		5	0	0	0	0			5	0	0	0	0		5	0	0	0	0
6	14	17	17	13		6	6	11	5	6			6	0	0	0	0		6	0	0	0	0
7	14	17	17	13		7	13	16	17	17			7	0	0	0	0		7	0	0	0	0
8	14	17	17	15		8	13	16	17	17			8	0	0	0	0		8	0	0	0	0
9	14	18	17	16		9	13	17	17	17			9	0	0	0	0		9	0	0	0	0
10	14	18	17	16		10	13	17	17	17			10	14	14	13	13		10	0	1	0	0
11	14	18	17	16		11	13	17	17	18			11	14	17	17	13		11	12	15	10	13
12	14	18	17	16		12	13	17	17	18			12	14	17	17	13		12	13	16	16	16
13	14	18	17	16		13	13	17	17	18			13	14	17	17	14		13	13	17	17	16
14	15	18	17	16		14	13	17	17	18			14	14	17	17	14		14	13	17	17	16
15	15	18	17	16		15	13	17	17	18			15	14	17	17	14		15	13	17	17	16
16	15	18	17	16		16	13	17	17	18			16	14	17	17	14		16	13	17	17	16
17	15	18	17	16		17	13	17	17	18			17	14	17	17	14		17	13	17	17	16
18	15	18	17	16		18	13	17	17	18			18	14	17	17	14		18	13	17	17	16
0.1 mM						10 mM							0.1 mM						10 mM
	No. of pupae (cumulative)						No. of pupae (cumulative)							No. of adults (cumulative)						No. of adults (cumulative)
Day no.	Set1	Set2	Set3	Set4		Day no.	Set1	Set2	Set3	Set4			Day no.	Set1	Set2	Set3	Set4		Day no.	Set1	Set2	Set3	Set4
0	0	0	0	0		0	0	0	0	0			0	0	0	0	0		0	0	0	0	0
1	0	0	0	0		1	0	0	0	0			1	0	0	0	0		1	0	0	0	0
2	0	0	0	0		2	0	0	0	0			2	0	0	0	0		2	0	0	0	0
3	0	0	0	0		3	0	0	0	0			3	0	0	0	0		3	0	0	0	0
4	0	0	0	0		4	0	0	0	0			4	0	0	0	0		4	0	0	0	0
5	7	4	7	12		5	0	0	0	0			5	0	0	0	0		5	0	0	0	0
6	17	18	17	16		6	0	0	0	0			6	0	0	0	0		6	0	0	0	0
7	18	18	17	16		7	0	0	0	0			7	0	0	0	0		7	0	0	0	0
8	18	18	17	16		8	0	0	0	0			8	0	0	0	0		8	0	0	0	0
9	18	18	17	17		9	4	2	8	2			9	0	0	0	0		9	0	0	0	0
10	18	18	17	17		10	11	13	11	9			10	12	9	15	12		10	0	0	0	0
11	18	18	17	17		11	11	17	13	11			11	17	16	17	16		11	0	0	0	0
12	18	18	17	17		12	11	18	13	13			12	17	17	17	16		12	0	0	0	0
13	18	18	17	17		13	12	18	13	14			13	17	17	17	16		13	0	0	0	0
14	18	18	17	17		14	12	18	13	14			14	17	17	17	16		14	3	0	4	0
15	18	18	17	17		15	12	18	14	14			15	17	17	17	16		15	10	9	11	5
16	18	18	17	17		16	12	18	14	14			16	17	17	17	16		16	11	17	13	10
17	18	18	17	17		17	12	18	14	14			17	17	17	17	16		17	11	18	13	12
18	18	18	17	17		18	12	18	14	14			18	17	17	17	16		18	11	18	13	13
FIGURE 1 - SUPPLEMENT 4-C								FIGURE 1 - SUPPLEMENT 4-D
S. No.	Speed (Solvent)		S. No.	Speed (TMP)				S. No.	Latency to finding odor (solvent)		S. No.	Latency to finding odor (TMP)
1	1.64052		1	1.36425				1	-		1	52
2	4.6714		2	3.30127				2	117.484		2	228.5
3	3.84197		3	0.563742				3	-		3	355
4	4.24792		4	7.12948				4	57.484		4	144.5
5	0.860932		5	1.66003				5	-		5	150
6	1.76393		6	4.9509				6	-		6	7.5
7	1.94157		7	4.23578				7	16		7	13
8	7.3197		8	3.25512				8	-		8	-
9	0.278386		9	3.32793				9	123.5		9	14
10	5.4117		10	4.26108				10	-		10	424.5
11	1.97718		11	5.45276				11	-		11	85.5
12	6.16245		12	0.682797				12	533.863		12	195.5
13	0.280295		13	3.94124				13	59		13	-
14	2.89017		14	1.59423				14	66		14	77.5
15	10.2565		15	5.65687				15	10.5		15	65.483
16	9.62036		16	1.36153				16	33.5		16	292.925
17	0.916057		17	0.730463				17	358.5		17	-
18	5.10354		18	7.77996				18	84		18	543
19	5.32655		19	6.98715				19	-		19	129.5
20	7.4862		20	6.97381				20	57.985		20	485
21	4.16421		21	5.60947				21	50.487		21	80
22	3.03907		22	5.62646				22	54		22	-
23	2.65455		23	10.3112				23	235.5		23	48.987
24	3.76827		24	10.955				24	17		24	21.494
25	5.67088		25	3.54878				25	233		25	-
26	12.978		26	5.61859				26	13		26	283.927
27	5.8657		27	0.863407				27	49.5		27	144.5
28	9.3608		28	4.94007				28	61.5		28	34.5
29	8.73373		29	2.95088				29	49.5		29	-
30	7.68093		30	1.87879				30	387		30	-
31	1.10684		31	6.16343				31	-		31	105.5
32	2.60052		32	2.97371				32	101.5		32	-
33	6.62763		33	7.30798				33	64		33	-
34	9.40967		34	1.28194				34	100		34	411
35	4.11801		35	12.2513				35	-		35	576
36	2.03035		36	7.82167				36	-		36	118
37	0.573617		37	0.715407				37	316		37	-
38	3.89474		38	1.54226				38	-		38	425.5
39	0.683874		39	0.933795				39	-		39	-
40	2.07511		40	0.778902				40	111.5		40	-
41	4.92223		41	6.40594				41	10		41	-
42	4.31269		42	1.96111				42	569		42	119
43	0.693567		43	4.44122				43	54.5		43	-
44	2.28437		44	6.9177				44	39		44	49
45	0.289361		45	5.01223				45	-		45	168
46	6.90605		46	6.91739				46	163.5		46	335.5
47	6.68273		47	3.26095				47	-		47	-
48	3.7967		48	7.79451				48	36.5		48	386
49	2.27893		49	4.58932				49	19.5		49	-
50	0.77746		50	2.57892				50	68.5		50	576.5
51	9.0087		51	11.5152				51	539.5		51	10
52	1.74863		52	3.39609				52	435.484		52	151
53	0.280169		53	3.29972				53	-		53	-
54	2.58645		54	1.09948				54	-		54	339.5
55	2.20381		55	8.77924				55	184.5		55	60
56	6.06893		56	1.69636				56	-		56	440
57	5.19847		57	1.45118				57	381		57	27
58	1.85177		58	5.52693				58	204		58	-
59	9.81185		59	0.739263				59	140.5		59	231
60	1.44593		60	6.54757				60	585.5		60	89
61	3.66015		61	0.430955				61	-		61	-
62	1.68549		62	5.68917				62	34.5		62	19.5
63	5.8036		63	0.532187				63	282.5		63	40.5
64	5.17148		64	5.66347				64	210.5		64	19.5
65	2.60211		65	8.79788				65	55.5		65	-
66	0.864421		66	1.26712				66	277		66	35
67	6.25964		67	8.25277				67	129		67	99.5
68	0.332558		68	4.25564				68	316		68	-
69	8.63723		69	8.43537				69	-		69	47.5
70	3.11412		70	3.14779				70	63		70	-
71	2.98775		71	5.73259				71	-		71	54
72	7.28443		72	6.85482				72	-		72	-
73	4.29349		73	11.8603				73	26		73	461
74	3.82883		74	4.02249							74	14.5
75	8.82448		75	6.39083							75	-
76	3.40265		76	7.08667							76	46
77	2.72217		77	0.586378							77	328
78	0.540169		78	1.87933							78	102
79	4.99983		79	8.03743							79	33.5
80	2.89978		80	5.05654							80	30.5
81	7.55205		81	1.28184							81	35.5
82	7.39995		82	2.14401							82	46.5
83	6.70196		83	4.08245							83	-
84	3.38874		84	1.33123							84	-
85	7.64372		85	3.85977							85	84.5
86	4.70565		86	2.97742							86	442.5
87	1.49887		87	7.31608
88	3.11759		88	2.18953
89	1.91882		89	6.06585
90	11.0379		90	1.41145
91	1.60304		91	1.21936
92	2.73339		92	0.240789
93	0.54131		93	2.8188
94	1.85559		94	2.18718
95	4.34797		95	4.63802
96	4.61842		96	0.839019
97	1.89868		97	5.72064
98	6.73935		98	5.77881
99	5.85885		99	3.74766
100	2.08097		100	1.43594
101	4.00584		101	2.57786
102	6.7279		102	0.242856
103	6.38768		103	1.68669
104	0.927519		104	1.97899
105	3.72798		105	5.99935
106	5.02023		106	1.24371
107	1.55192		107	1.23792
108	2.04375		108	3.57864
109	2.19974		109	6.06676
110	6.20069		110	2.01379
111	8.73008		111	7.92279
112	5.95204		112	3.07119
113	1.84867		113	2.47991
114	4.11268		114	0.474881
115	1.99632		115	0.700661
116	2.06183		116	1.82995
117	0.982238		117	12.035
118	5.37555		118	5.15098
119	1.10133		119	2.69757
120	3.55583		120	6.57213
121	4.68863		121	0.726562
122	10.4635		122	2.17221
123	4.50049		123	2.13409
124	7.40395		124	5.05016
125	2.20624		125	0.646631
126	4.70214		126	1.02017
127	0.517222		127	4.57411
128	4.60365		128	4.15986
129	4.08844		129	4.35609
130	4.54228		130	2.35546
131	1.49467		131	2.80018
132	4.61624		132	3.96574
133	12.3253		133	2.25334
134	4.16844		134	3.34047
135	2.9318		135	3.51926
136	6.04436		136	5.58278
137	4.58606		137	4.69872
138	10.1429		138	0.859944
139	3.34971		139	2.21878
140	5.12237		140	4.36924
141	1.75786		141	5.70702
142	3.84029		142	1.43594
143	5.2091		143	7.55601
144	11.4445		144	2.64243
145	7.67655		145	6.19939
146	1.83064		146	8.05404
147	4.29044		147	2.31864
148	2.98901		148	9.72488
149	4.34613		149	1.41314
150	3.98708		150	9.13241
151	1.82761		151	4.89161
152	0.886765		152	8.95975
153	3.08631		153	3.78908
154	1.64393		154	6.36384
155	0.777219		155	4.12018
156	5.07936		156	6.15537
157	2.95634		157	6.28638
158	2.96687		158	2.72335
159	1.95998		159	3.84314
160			160	3.21974
161			161	4.46457
