# Supplementary material for: A versatile genetic tool for post-translational control of gene expression in Drosophila melanogaster
Source: eLife. 2017 Nov 15;6:e30327. doi: 10.7554/eLife.30327 (PMC5703639; doi:10.7554/eLife.30327)
Supplement: Figure 1—source data 1. [file elife-30327-fig1-data1.xlsx]

## Sheet: Sheet1
FIGURE 1D
0 mM							0.001 mM							0.01 mM							0.1 mM							1 mM							5 mM
Sample	ROI	Back1	Back2	Back3	ROI - back		Sample	ROI	Back1	Back2	Back3	ROI - back		Sample	ROI	Back1	Back2	Back3	ROI - back		Sample	ROI	Back1	Back2	Back3	ROI - back		Sample	ROI	Back1	Back2	Back3	ROI - back		Sample	ROI	Back1	Back2	Back3	ROI - back
1	14.557	8.68	10.109	9.453	5.143		1	32.772	8.376	8.915	9.644	23.7937		1	82.047	11.274	11.054	10.162	71.217		1	139.863	12.59	12.25	11.565	127.728		1	196.006	15.399	13.506	13.166	181.982		1	188.666	12.571	17.261	16.498	173.223
2	13.616	8.271	9.053	9.867	4.55233		2	29.901	9.441	10.131	10.874	19.7523		2	85.744	10.908	12.286	11.928	74.0367		2	155.633	12.073	13.38	14.241	142.402		2	130.386	10.829	13.101	12.904	118.108		2	193.543	18.347	15.005	19.885	175.797
3	14.169	9.398	9.452	8.666	4.997		3	25.121	9.252	10.278	10.57	15.0877		3	55.966	9.088	10.445	12.441	45.308		3	130.827	10.958	12.766	11.9	118.952		3	185.791	12.11	15.745	11.267	172.75		3	206.266	13.124	17.66	15.856	190.719
4	14.049	9.511	10.725	11.189	3.574		4	40.433	9.811	9.525	8.989	30.9913		4	79.142	10.982	9.486	9.35	69.2027		4	113.809	12.215	13.173	13.548	100.83		4	187.721	14.8	13.722	12.95	173.897		4	157.832	13.192	15.218	16.744	142.781
5	15.248	9.885	11.407	10.586	4.622		5	33.507	8.927	10.021	10.332	23.747		5	93.028	11.537	12.888	12.687	80.6573		5	116.045	11.019	13.56	12.748	103.603		5	134.521	10.815	12.178	13.12	122.483		5	92.864	10.2	14.704	13.335	80.1177
6							6							6							6	114.029	9.447	12.663	12.833	102.381		6	176.607	12.32	10.756	15.267	163.826		6
				Average	4.57767						Average	22.6744						Average	68.0843						Average	115.983						Average	155.508						Average	152.528
				SEM	0.274353						SEM	2.62366						SEM	6.01388						SEM	6.86195						SEM	11.3943						SEM	19.7061
FIGURE 1F
0 hr							12 hr							24 hr							36 hr							48 hr							60 hr
Sample	ROI	Back1	Back2	Back3	ROI - back		Sample	ROI	Back1	Back2	Back3	ROI - back		Sample	ROI	Back1	Back2	Back3	ROI - back		Sample	ROI	Back1	Back2	Back3	ROI - back		Sample	ROI	Back1	Back2	Back3	ROI - back		Sample	ROI	Back1	Back2	Back3	ROI - back
1	4.416	2.573	2.712	2.803	1.72		1	22.103	10.34	9.694	7.919	12.7853		1	79.197	8.173	12.524	11.594	68.4333		1	106.52	11.466	13.801	13.091	93.734		1	102.058	11.907	14.843	16.42	87.668		1	85.716	9.479	13.846	9.491	74.7773
2	4.998	2.883	2.894	2.972	2.08167		2	24.067	10.721	8.637	11.061	13.9273		2	54.066	15.555	16.141	16.917	37.8617		2	106.722	11.794	14.039	14.165	93.3893		2	116.982	14.131	17.663	15.391	101.254		2	95.738	11.528	11.021	9.425	85.08
3	3.334	1.966	2.054	2.195	1.26233		3	25.9	11.831	11.576	8.924	15.123		3	67.787	11.498	11.331	11.251	56.427		3	122.463	14.604	17.265	15.15	106.79		3	130.816	12.271	14.068	13.553	117.519		3	90.763	13.091	12.178	13.405	77.8717
4	2.938	1.716	1.769	1.896	1.14433		4	32.075	6.432	10.08	8.477	23.7453		4	85.263	13.318	14.497	13.449	71.5083		4	146.525	13.62	17.135	15.8	131.007		4	139.506	13.431	14.336	16.596	124.718		4	112.832	11.482	10.452	10.673	101.963
5	3.491	2.057	2.477	2.2	1.24633		5	15.791	6.814	6.851	7.09	8.87267		5	81.503	12.705	13.364	15.07	67.79		5	130.306	15.247	18.771	14.471	114.143		5	134.634	13.805	18.149	19.225	117.574		5	94.525	8.498	10.955	12.19	83.9773
6							6	19.352	9.106	10.519	12.056	8.79167		6	75.179	17.211	12.497	13.923	60.6353		6	107.085	15.829	13.155	15.494	92.259		6	113.14	11.727	12.482	12.302	100.97		6	119.868	9.852	10.858	12.215	108.893
				Average	1.49093						Average	13.8742						Average	60.4426						Average	105.22						Average	108.284						Average	88.7604
				SEM	0.177997						SEM	2.24377						SEM	5.0542						SEM	6.28999						SEM	5.68513						SEM	5.5682
FIGURE 1H
0 hr							12 hr							24 hr							36 hr
Sample	ROI	Back1	Back2	Back3	ROI - back		Sample	ROI	Back1	Back2	Back3	ROI - back		Sample	ROI	Back1	Back2	Back3	ROI - back		Sample	ROI	Back1	Back2	Back3	ROI - back
1	100.075	-	-	-	100.075		1	93.806	-	-	-	93.806		1	60.018	-	-	-	60.018		1	15.106	-	-	-	15.106
2	86.469	-	-	-	86.469		2	52.012	-	-	-	52.012		2	20.747	-	-	-	20.747		2	17.713	-	-	-	17.713
3	99.877	-	-	-	99.877		3	82.509	-	-	-	82.509		3	22.66	-	-	-	22.66		3	21.603	-	-	-	21.603
4	113.405	-	-	-	113.405		4	59.111	-	-	-	59.111		4	18.728	-	-	-	18.728		4	23.7	-	-	-	23.7
5	87.346	-	-	-	87.346		5	67.516	-	-	-	67.516		5	15.618	-	-	-	15.618		5	20.381	-	-	-	20.381
6	80.427	-	-	-	80.427		6	80.433	-	-	-	80.433		6	16.255	-	-	-	16.255		6	9.963	-	-	-	9.963
7	75.451	-	-	-	75.451		7	91.59	-	-	-	91.59		7	19.554	-	-	-	19.554		7	9.135	-	-	-	9.135
8	67.511	-	-	-	67.511		8	72.49	-	-	-	72.49		8	27.711	-	-	-	27.711		8	13.124	-	-	-	13.124
9							9							9	18.706	-	-	-	18.706		9	19.125	-	-	-	19.125
10							10							10	20.593	-	-	-	20.593		10
				Average	88.8201						Average	74.9334						Average	24.059						Average	16.65
				SEM	5.28526						SEM	5.27457						SEM	4.1377						SEM	1.71358
