# Supplementary material for: A versatile genetic tool for post-translational control of gene expression in Drosophila melanogaster
Source: eLife. 2017 Nov 15;6:e30327. doi: 10.7554/eLife.30327 (PMC5703639; doi:10.7554/eLife.30327)
Supplement: Figure 2—figure supplement 1—source data 1. [file elife-30327-fig2-figsupp1-data1.xlsx]

## Sheet: Sheet1
	Dev stage	0 day
	S.No.	ROI1	Back1	Back2	Back3	Avg			S.No.	ROI1	Back1	Back2	Back3	Avg
Solvent	1	33.848	27.628	26.099	28.115	6.56733		TMP	1	32.635	23.393	27.183	33.28	4.683
	2	33.447	27.436	28.096	31.007	4.60067			2	34.579	33.52	32.394	36.586	0.412333
	3	14.765	7.548	7.441	8.642	6.888			3	27.674	22.217	23.548	28.867	2.79667
	4	34.61	29.039	31.623	34.005	3.05433			4	40.346	42.072	42.107	33.489	1.12333
	5	33.865	25.723	25.445	30.907	6.50667			5	32.76	32.9	32.2	34.015	-0.278333
	6	28.194	19.288	16.968	21.13	9.06533			6	33.701	27.177	27.947	36.49	3.163
					Average	6.11372							Average	1.98333
					SEM	0.843028							SEM	0.767335
	Dev stage	1 day
	S.No.	ROI1	Back1	Back2	Back3	Avg			S.No.	ROI1	Back1	Back2	Back3	Avg
Solvent	1	133.825	48.806	43.979	51.52	85.7233		TMP	1	43.476	28.607	27.975	38.51	11.7787
	2	122.473	34.349	35.04	39.417	86.2043			2	42.704	30.52	34.186	45.289	6.039
	3	129.934	36.751	33.989	42.2	92.2873			3	53.036	34.941	34.375	36.628	17.7213
	4	100.468	36.433	38.287	43.121	61.1877			4	52.031	34.825	34.296	33.207	17.9217
	5	73.484	41.093	41.226	36.277	33.952			5	42.944	32.413	31.653	39.958	8.26933
	6	111.325	50.886	46.812	54.489	60.596			6	49.655	31.56	34.031	35.145	16.0763
					Average	69.9918							Average	12.9677
					SEM	9.07759							SEM	2.06799
	Dev stage	2 day
	S.No.	ROI1	Back1	Back2	Back3	Avg			S.No.	ROI1	Back1	Back2	Back3	Avg
Solvent	1	101.139	35.458	34.312	38.986	64.887		TMP	1	40.274	31.323	29.232	31.377	9.63
	2	74.435	34.42	34.898	36.725	39.0873			2	42.134	25.581	22.036	31.782	15.6677
	3	69.165	32.464	29.353	33.735	37.3143			3	37.354	30.335	29.793	29.904	7.34333
	4	79.894	32.114	31.139	29.97	48.8197			4	45.986	33.308	33.557	33.114	12.6597
	5	73.61	30.077	31.186	31.33	42.7457			5	37.718	28.63	25.374	31.451	9.233
	6	109.888	34.357	40.357	39.686	71.7547			6
					Average	50.7681							Average	10.9067
					SEM	5.84631							SEM	1.46404
