# Supplementary material for: A versatile genetic tool for post-translational control of gene expression in Drosophila melanogaster
Source: eLife. 2017 Nov 15;6:e30327. doi: 10.7554/eLife.30327 (PMC5703639; doi:10.7554/eLife.30327)
Supplement: Figure 2—source data 1. [file elife-30327-fig2-data1.xlsx]

## Sheet: Sheet1
FIGURE 2-A
Solvent							TMP
Sample	ROI	Back1	Back2	Back3	ROI - back		Sample	ROI	Back1	Back2	Back3	ROI - back
1	64.436	18.284	23.35	21.315	43.453		1	30.815	25.582	28.543	27.306	3.67133
2	77.176	18.462	16.873	18.244	59.3163		2	48.386	48.625	39.807	33.978	7.58267
3	76.724	25.509	20.482	19.31	54.957		3	29.036	23.602	23.795	21.811	5.96667
4	82.55	21.603	18.975	18.132	62.98		4	34.396	32.596	26.097	29.152	5.11433
5	86.309	21.195	20.556	21.376	65.2667		5	27.405	24.585	22.478	22.267	4.295
				Average	57.1946						Average	5.326
				SEM	3.85337						SEM	0.683692
FIGURE 2-C
	0 days: TMP continuously									0 days: Solvent continuously
Sample	1	2	3	4	5				Sample	1	2	3	4	5
ROI	9.803	18.691	11.866	10.188	14.562				ROI	64.35	69.818	97.046	78.959	73.793
Back1	7.173	9.911	8.498	7.4	10.603				Back1	10.917	11.613	11.134	11.337	11.256
Back2	7.114	11.029	9.141	6.921	11.032				Back2	8.883	10.057	10.69	11.198	10.952
Back3	7.214	7.753	10.211	7.787	8.776	Mean	SEM		Back3	7.049	10.897	9.731	7.337	8.697	Mean	SEM
ROI - back	2.636	9.12667	2.58267	2.81867	4.425	4.3178	1.24946		ROI - back	55.4003	58.9623	86.5277	69.0017	63.4913	66.6767	5.46022
	1 day: TMP continuously									1 day: Solvent continuously									1 day: TMP removal
Sample	1	2	3	4	5				Sample	1	2	3	4	5				Sample	1	2	3	4	5
ROI	16.5	10.765	11.477	13.906	16.814				ROI	103.751	89.255	108.432	113.367	129.395				ROI	32.485	22.041	17.001	35.211	33.677
Back1	8.351	7.859	8.695	9.513	11.772				Back1	10.683	12.948	10.456	10.605	9.111				Back1	10.177	9.804	9.432	11.438	12.102
Back2	9.44	8.07	8.388	9.171	13.352				Back2	10.798	12.027	13.26	11.671	10.12				Back2	9.937	9.067	8.889	10.951	10.835
Back3	8.825	7.811	9.634	10.661	8.971	Mean	SEM		Back3	9.05	11.546	14.132	11.253	11.759	Mean	SEM		Back3	10.34	9.757	9.48	11.672	12.64	Mean	SEM
ROI - back	7.628	2.85167	2.57133	4.12433	5.449	4.52487	0.928972		ROI - back	93.574	77.0813	95.816	102.191	119.065	97.5454	6.79048		ROI - back	22.3337	12.4983	7.734	23.8573	21.818	17.6483	3.1836
	2 days: TMP continuously									2 days: Solvent continuously									2 days: TMP removal
Sample	1	2	3	4	5				Sample	1	2	3	4	5				Sample	1	2	3	4	5
ROI	24.529	20.24	21.062	19.501	17.857				ROI	105.212	105.23	78.932	110.301	99.621				ROI	84.845	101.267	60.084	58.077	58.918
Back1	13.202	15.781	13.975	15.26	14.101				Back1	10.428	9.361	12.079	11.795	12.485				Back1	11.045	9.842	15.355	12.948	13.005
Back2	12.888	13.349	15.873	14.88	14.495				Back2	10.164	10.15	12.357	11.478	11.903				Back2	11.864	10.848	14.452	11.206	12.469
Back3	14.669	12.1	17.255	13.685	14.288	Mean	SEM		Back3	12.987	11.564	12.687	13.251	12.604	Mean	SEM		Back3	14.025	14.784	11.967	11.754	15.045	Mean	SEM
ROI - back	10.9427	6.49667	5.361	4.89267	3.56233	6.25107	1.26369		ROI - back	94.019	94.8717	66.5577	98.1263	87.2903	88.173	5.68383		ROI - back	72.5337	89.4423	46.1593	46.1077	45.4117	59.9309	9.00361
	3 days: TMP continuously									3 days: Solvent continuously									3 days: TMP removal
Sample	1	2	3	4	5				Sample	1	2	3	4	5				Sample	1	2	3	4	5
ROI	18.647	16.029	21.608	21.431					ROI	173.185	180.114	185.452	160.338	157.455				ROI	69.588	79.683	131.564	104.351	126.967
Back1	13.511	13.004	16.304	13.524					Back1	13.439	12.883	13.857	16.223	10.621				Back1	14.802	11.334	13.389	15.19	23.805
Back2	15.227	14.82	12.485	13.45					Back2	14.581	14.771	14.788	16.102	12.211				Back2	15.491	11.957	17.519	14.339	25.858
Back3	16.16	12.128	13.841	13.017		Mean	SEM		Back3	14.438	14.828	14.746	17.113	14.159	Mean	SEM		Back3	15.614	14.092	15.31	14.545	18.765	Mean	SEM
ROI - back	3.681	2.71167	7.398	8.10067		5.47283	1.33686		ROI - back	159.032	165.953	170.988	143.859	145.125	156.991	5.44832		ROI - back	54.2857	67.222	116.158	89.6597	104.158	86.2966	11.4249
	4 days: TMP continuously									4 days: Solvent continuously									4 days: TMP removal
Sample	1	2	3	4	5				Sample	1	2	3	4	5				Sample	1	2	3	4	5
ROI	14.332	12.988	22.229	13.356					ROI	143.993	138.045	176.986	143.152	159.942				ROI	92.492	123.893	91.371	91.603	77.135
Back1	10.753	9.999	13.082	9.749					Back1	13.86	12.757	16.719	12.806	14.749				Back1	15.026	13.681	13.479	15.441	13.67
Back2	10.729	10.012	15.654	12.942					Back2	14.564	13.164	15.218	16.651	16.056				Back2	15.835	13.459	16.258	13.896	13.886
Back3	9.404	9.946	12.429	11.298		Mean	SEM		Back3	15.639	13.558	16.257	15.99	15.203	Mean	SEM		Back3	15.987	17.126	16.303	12.676	14.447	Mean	SEM
ROI - back	4.03667	3.00233	8.50733	2.02633		4.39317	1.43148		ROI - back	129.305	124.885	160.921	128.003	144.606	137.544	6.7658		ROI - back	76.876	109.138	76.0243	77.5987	63.134	80.5541	7.62647
FIGURE 2-E
	Gr21-GAL4		UAS-TNT; nsyb-GAL80-DD		Gr21-GAL4, TNT-G; Nsyb-gal80-dd
SOLVENT	-1		-0.172414		-0.407407
SOLVENT	-0.666667		-0.692308		-0.0909091
SOLVENT	-0.545455		-0.333333		-0.037037
SOLVENT	-0.666667		-0.586207		0.0909091
SOLVENT	-0.777778		-0.533333		-0.5
SOLVENT	-0.851852		-0.307692		-0.185185
SOLVENT	-0.6		-0.428571		0.142857
SOLVENT	-0.76		-0.517241		-0.1
SOLVENT	-0.84		-0.461538		0
SOLVENT	-1		-0.444444		-0.357143
SOLVENT	-0.923077		-0.44		-0.2
AVG	-0.784681		-0.447008		-0.149447
SEM	0.0466416		0.0426692		0.061825
TMP	-0.851852		-0.565217		-0.538462
TMP	-0.923077		-0.6		-0.333333
TMP	-0.692308		-0.538462		-0.5
TMP	-0.793103		-0.925926		-0.925926
TMP	-0.785714		-0.857143		-0.555556
TMP	-0.8		-0.666667		-0.733333
TMP	-0.8		-0.571429		-0.818182
TMP	-0.923077		-0.333333		-0.714286
TMP	-0.84		-0.636364		-0.642857
TMP	-1		-0.714286		-0.5
TMP	-0.586207		-1		-0.764706
AVG	-0.817758		-0.67353		-0.638785
SEM	0.0342016		0.0578894		0.051695
