# Supplementary material for: A versatile genetic tool for post-translational control of gene expression in Drosophila melanogaster
Source: eLife. 2017 Nov 15;6:e30327. doi: 10.7554/eLife.30327 (PMC5703639; doi:10.7554/eLife.30327)
Supplement: Figure 3—source data 1. [file elife-30327-fig3-data1.xlsx]

## Sheet: Sheet1
FIGURE 3-B
	1 mM			0.1			0.05			0.01			0 mM
Sample	Left	Right		Left	Right		Left	Right		Left	Right		Left	Right
1	68	54		45	37		23	18		6	12		0	0
2	53	60		35	42		33	29		8	5		0	0
3	50	57		50	41		34	35		9	12		1	1
4	57	54		36	42		36	38		17	19		0	0
5	57	49		43	34		38	36		5	5		1	1
6	56	59		39	39		31	30		6	6		0	0
7	52	41		38	38		32	37		12	29		1	0
8				38	41		30	29					0	1
FIGURE 3-C
	Hemisphere no.	No. of cells
	1	0
	2	0
	3	1
	4	0
	5	1
	6	0
	7	1
	8	0
	9	0
	10	0
	11	1
	12	0
	13	1
	14	0
	15	0
	16	1
	17	1
	18	1
	19	4
	20	3
	21	0
	22	0
	23	1
	24	0
	25	0
	26	3
	27	3
	28	2
	29	1
	30	3
	31	1
	32	0
	33	3
	34	0
	35	2
	36	1
	37	3
	38	3
	39	3
	40	1
	41	1
	42	1
	43	1
	44	1
	45	0
	46	2
	47	1
	48	2
	49	1
	50	1
	51	1
	52	1
	53	0
	54	2
	55	3
	56	1
	57	1
	58	0
	59	0
	60	1
	61	0
	62	1
	63	0
	64	1
	65	0
	66	0
	67	1
	68	0
	69	0
	70	1
	71	0
	72	1
