# Supplementary figures and images for: A versatile genetic tool for post-translational control of gene expression in Drosophila melanogaster
Source: eLife journal article supplement (doi:10.7554/elife.30327), 2017-11-15

Figure 1 - Supplement 4

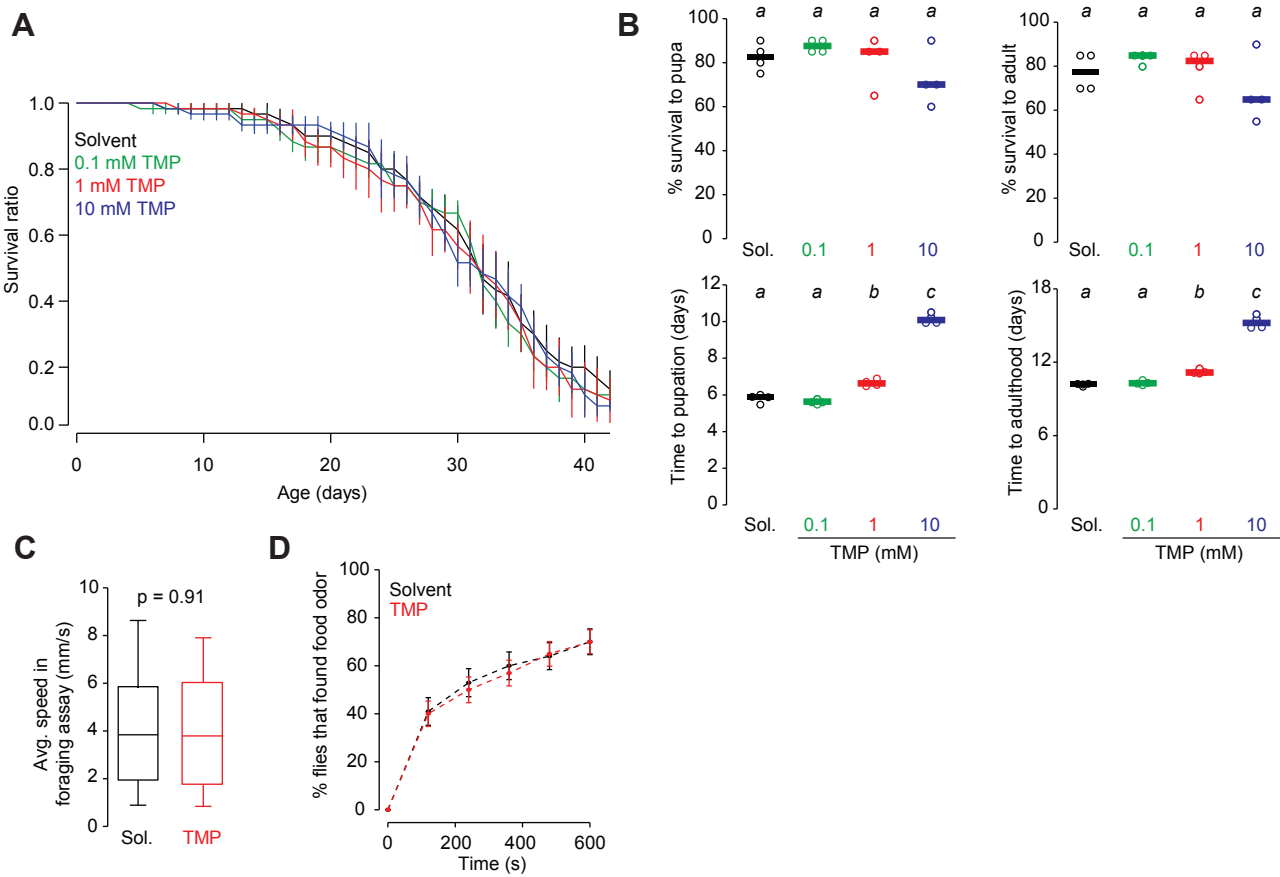

Supplement: supp [file elife-30327-supp-v1.zip]

**Figure 1 - Supplement 2**

**A**

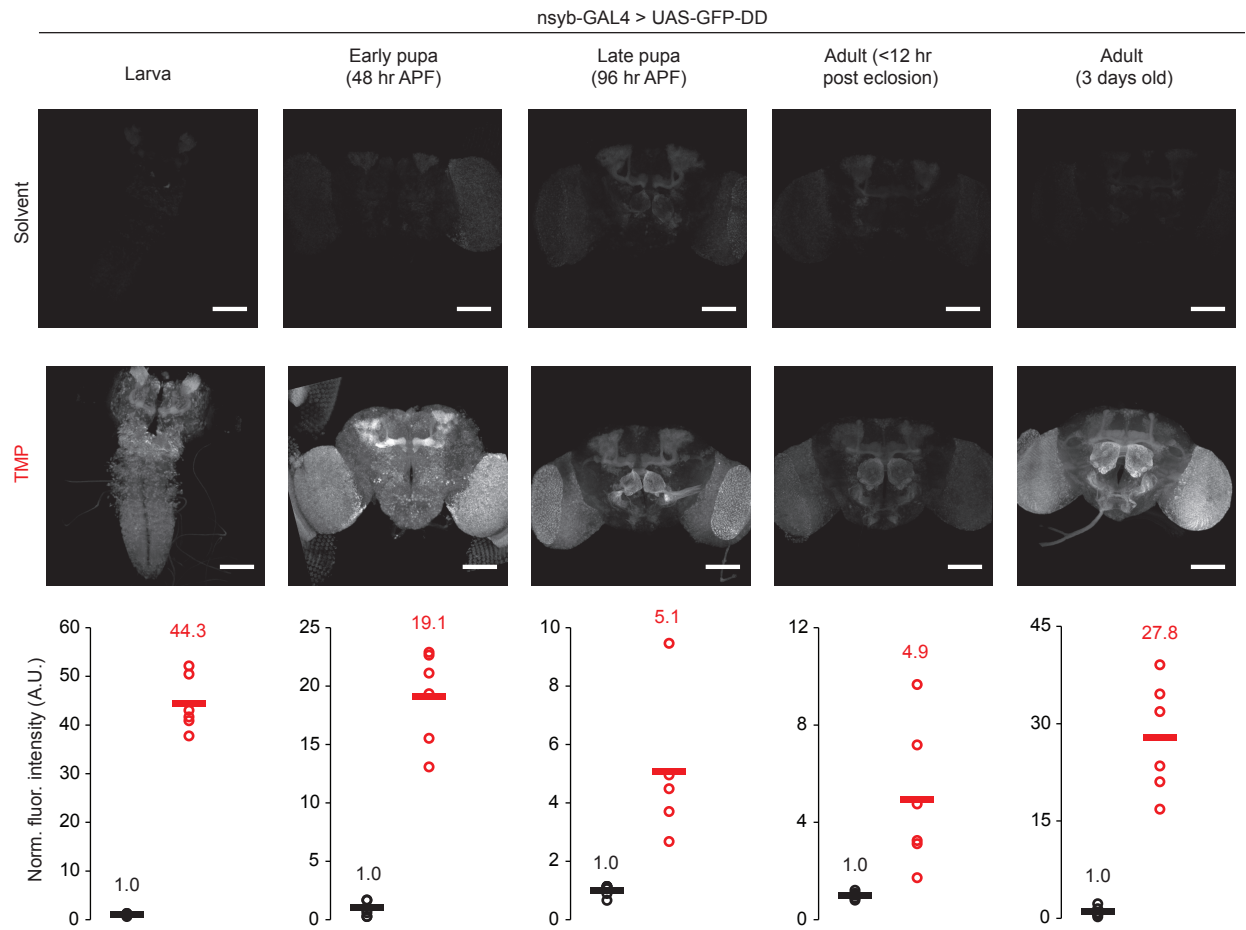

Supplement: supp [file elife-30327-supp-v1.zip]

Figure 1 - Supplement 3

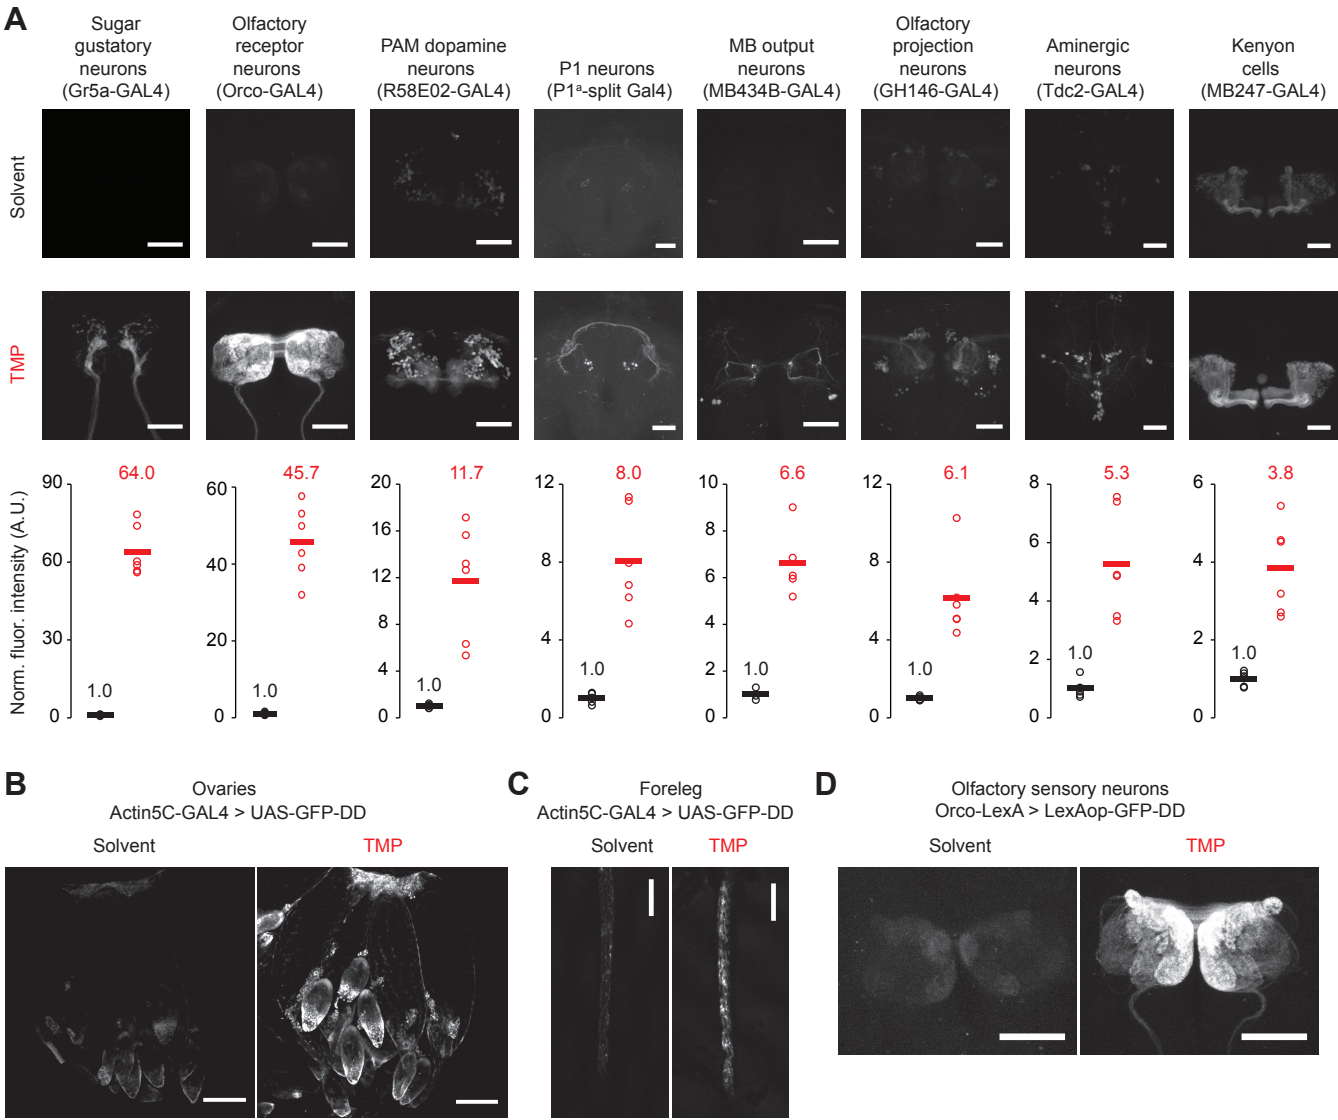

Supplement: supp [file elife-30327-supp-v1.zip]

Figure 2 - Supplement 1

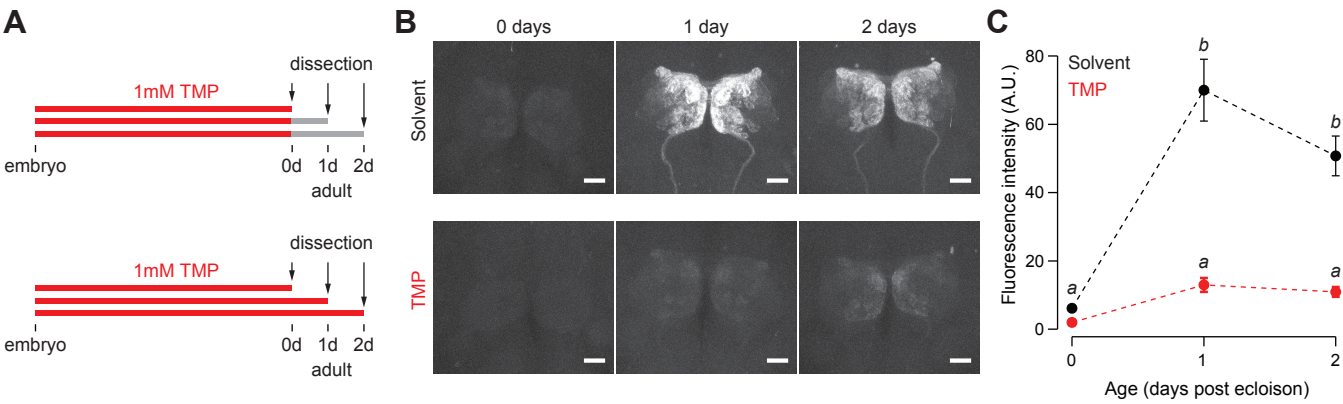

Supplement: supp [file elife-30327-supp-v1.zip]

**A**

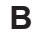[illegible]

Supplement: supp [file elife-30327-supp-v1.zip]

**Figure 4 - figure supplement 1**

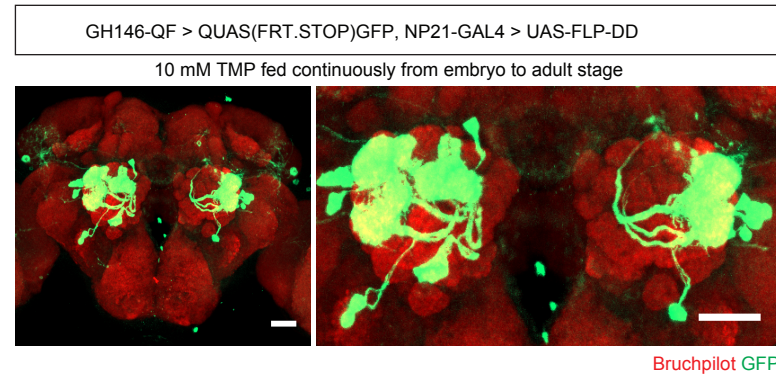

Supplement: supp [file elife-30327-supp-v1.zip]
